# Supplementary material
Source: Springer Nature journal article supplement (https://www.springermedizin.de/resource/supplementary/13054_2010_9366_MOESM1_ESM.pdf/9705996)
Supplement: MOESM1 [file 9705996]

**97 CMV-IgG-positive patients were monitored for CMV reactivation**

11 of them died or were discharged within 72 h

**86 patients were enrolled for data analysis**

77 of them delivered blood and respiratory samples, 9 only blood samples

**35 patients with CMV reactivation (PCR)**

**51 patients without CMV reactivation**

**10x  
in blood**

**12x  
in blood  
and lung**

**13x  
in the lung**

**22x in leukocytes**

**10x also in plasma**

**23x active HSV infection  
of the lung**

**21x active HSV infection  
of the lung**
